# Supplementary material
Source: PubMed Central journal article supplement (PMC3220319)
Supplement: supp_00145.2011_tableS1.pdf [file supp_00145.2011_tableS1.pdf]

Supplementary Table 1

List of Primers used in the study

| Gene                  |     | Primer sequence                         | PCR |
|-----------------------|-----|-----------------------------------------|-----|
| TNF alpha             | For | 5' TGCCTATGTCTC AGCCTCTTC 3'            | 117 |
|                       | Rev | 5' GAG GCC ATT TGG GAA CTT CT 3'        |     |
| SOD1                  | For | 5' CAGGACCTCATTTTAATCCTC AC 3'          | 78  |
|                       | Rev | 5' TGCCACGGTCTCCAACAT 3'                |     |
| Lumican               | For | 5' TCGAGCTTGATCTCTCCTAT 3'              | 131 |
|                       | Rev | 5' TGG TCCCAGGATCTTACAGAA 3'            |     |
| FABP                  | For | 5' CCATGACTGGGGAAAAAGTC 3'              | 74  |
|                       | Rev | 5' GCC TTT GAA AGT TGT CAC CAT 3'       |     |
| TGF Beta1             | For | 5' TGG AGC AAC ATG TGG AAC TC 3'        | 71  |
|                       | Rev | 5' CAG CAG CCG GTT ACC AAG 3'           |     |
| TIMP-1                | For | 5' GCA AAG AGC TTT CTC AAA GAC C 3'     | 73  |
|                       | Rev | 5' AGG GAT AGA TAA ACA GGG AAA CAC T 3' |     |
| Collagen 1 $\alpha$ 1 | For | 5' CTC CTG GCA AGA ATG GAG AT 3'        | 91  |
|                       | Rev | 5' AAT CCA CGA GCA CCC TGA 3'           |     |
| 18S                   | For | 5' CTCAACACGGGAAACCTCAC 3'              | 110 |
|                       | Rev | 5' CGCTCCACCAACTAAGAACG 3'              |     |
| ASMA                  | For | 5' GGCA CCCA GGGC CAGA GTCA             | 178 |
|                       | Rev | 5' ATGA CACC CTGG TGAC GGGG 3'          |     |
| CHOP                  | For | Assay ID: Mn00492097-m1                 | 82  |
|                       | Rev | Assay ID: Mn00492097-m1                 |     |

|           |     |                                   |                     |
|-----------|-----|-----------------------------------|---------------------|
| PUMA      | For | Assay ID: Mn00519268-m1           | 61                  |
|           | Rev | Assay ID: Mn00519268-m1           |                     |
| SPP1      | For | 5' AGCCACAAGTTTCACAGCCACAAGG 3'   | 213                 |
|           | Rev | 5' CTGAGAAATGAGCAGTTAGTATTCCTG 3' |                     |
| PERK      | For | 5' ACCCAGATGGAACGAGTCCGGATTTT 3'  | 128                 |
|           | Rev | 5' CGCTCCGTGGGGGATGGAGA 3'        |                     |
| BiP/GRP78 | For | 5' ACTCCGGCGTGAGGTAGAAA           | 151                 |
|           | Rev | 5' AGAGCGGAACAGGTCCATGT 3'        |                     |
| ATF6      | For | 5' TGGGAGTGAGCTGCAAGTGT 3'        | 295                 |
|           | Rev | 5' ATAAGGGGGAACCGAGGAG 3'         |                     |
| XBP-1     | For | 5' AAACAGAGTAGCAGCGCAGACTGC 3'    | Spliced - 446       |
|           | Rev | 5' TCCTTCTGGGTAGACCTCTGGGA 3'     | Unspliced- 290, 183 |
